# Supplementary material for: More intense heatwaves under drier conditions: a compound event analysis in the Adige River basin (Eastern Italian Alps)
Source: Copernicus journal article supplement (doi:10.5194/egusphere-2025-1347), 2025-05-05
Supplement: Supplementary file [file egusphere-2025-1347-AC3-supplement.pdf]

I have carefully examined the manuscript titled "More intense heatwaves under drier conditions: a compound event analysis in the Adige River basin (Eastern Italian Alps)" (egusphere-2025-1347-2), submitted by Marc Lemus-Canovas, Alice Crespi, Elena Maines, Stefano Terzi, and Massimiliano Pittore from the Center for Climate Change and Transformation at Eurac Research, Bolzano-Bozen, Italy. This study investigates the increasing intensity and impacts of compound drought and heatwave (CDHW) events in the Adige River basin, with a particular focus on the significant event of May 2022. The authors employ a ranking of CDHW events from 1950 to 2023 using E-OBS data, a flow-analogue attribution approach with ERA5 geopotential height data, and an evaluation of EURO-CORDEX simulations to assess historical changes and future projections. Below, I provide my critical comments and recommendations to enhance the scientific rigor, clarity, and contribution of this work for publication in HESS journal.

**We sincerely appreciate the time and effort you have dedicated to reviewing our manuscript. Your constructive comments and suggestions have helped us improve the clarity and robustness of our study. Below, we provide a detailed response, where our revisions and clarifications are highlighted in bold.**

1) The abstract and introduction effectively outline the problem, highlight the 2022 CDHW event, and introduce the attribution methodology, making it accessible to a broad audience. The transition from the abstract to the introduction lacks fluidity. The abstract references a ranking of 119 events and the selection of the 2022 event but omits details on the ranking methodology or the rationale for the 1950-2023 timeframe, leaving a disjointed narrative.

**Thank you for your comment. We have addressed your suggestion by clarifying in the abstract that the ranking was based on a composite index derived from SPI-6 and daily maximum temperature (TX), thus improving the continuity between the abstract and the introduction (See L 14-16). All the other details on the composite index are provided in the methodology section (see section 3.2). We have also modified the goals of the paper listed at the end of the introduction by clarifying that i) we used the composite indicator and available data to identify the CDHW events occurred over the past decades and ii) based on this list of events we first assessed the relative intensity of the 2022 hot and dry episode in order to motivate the choice of selecting it as a meaningful event for performing the attribution analysis. Regarding the timeframe (1950–2023), this choice is determined by the availability of the E-OBS dataset, which provides consistent daily temperature and precipitation observations since 1950. All the related details to the data used are explained in section 3.1.**

2) The abstract briefly mentions the use of E-OBS data, a composite index, and the flow-analogue attribution approach with ERA5 data, but it lacks specificity. For instance, what components constitute the composite index (e.g., temperature, precipitation, spatial extent)? How was the 1-4°C increase in heatwave intensity determined? Providing a brief methodological outline would enhance transparency and allow readers to assess the robustness of the findings upfront.

**We appreciate your suggestion to provide greater specificity on the composite index and the attribution methodology. In the revised abstract, we now clarify that the index combines SPI-6 and a heatwave definition based on daily TX (as stated in the reply to your first comment). Regarding the reported 1-4 °C increase in heatwave intensity, this is already clarified in the current version of the abstract as stemming from the analogue-based attribution analysis (please see L23-25), which is described in detail in the Methods section (3.3). Moreover, as we specified above that the heatwave definition uses TX, it should be clearer now that the increase in heatwave intensity refers to the increase in the corresponding maximum temperature. We believe these details ensure the necessary balance between conciseness in the abstract and full transparency in the manuscript.**

3) The discussion of atmospheric circulation patterns (e.g., subtropical ridge, warm air from northern Africa) is informative but lacks quantification. Terms like "prolonged periods" and "pronounced precipitation deficits" are vague without supporting data or references to specific magnitudes observed in the Adige basin.

**Thank you again for your comment. We have expanded the introduction to clarify the mechanisms sustaining extreme temperatures, highlighting the role of persistent subtropical ridges over southern Europe, warm air advection from northern Africa, and subsidence-driven adiabatic warming. See our integrations in L47-48. This provides a clearer synoptic perspective of the phenomenon before narrowing the focus to the Adige basin. As regards the "qualitative" terminology used, we prefer to keep it general as we refer here to conditions potentially affecting different areas in the central Mediterranean region, so the specific magnitudes of intense heatwaves and precipitation deficits can vary depending on the local climate. Details on specific episodes and regional conditions can be found in the examples reported in lines 54-56.**

4) The introduction highlights the scarcity of attribution studies at the catchment scale and the unexplored performance of EURO-CORDEX models, which is a strong motivation. However, it does not preview the specific attribution method (flow-analogue approach) or the limitations of EURO-CORDEX simulations (e.g., spatial resolution, parameterization), which are critical for setting expectations.

**Thank you for this valuable suggestion. We have now revised the introduction to explicitly preview both the attribution method applied in this study and the limitations of EURO-CORDEX simulations. Specifically, we included a paragraph that highlights the emergence of flow-analogue approaches as a powerful tool to attribute extreme events, citing their successful application to different types of extremes (lines 66-74). In addition, we expanded the discussion on EURO-CORDEX by acknowledging their added value in complex topography compared to CMIP5/6 simulations, while also stressing their inherent limitations, such as the spatial resolution (0.11°-0.44°) and the uncertainties related to convection and land-atmosphere parameterizations, which are particularly relevant in Alpine catchments (lines 83-87).**

5) The use of E-OBS and ERA5 data is mentioned, but their resolution and potential biases (e.g., E-OBS's coarse grid in mountainous areas) are not addressed. This is particularly relevant given the Adige basin's complex topography.

**Thank you for pointing this out. We have now explicitly acknowledged in the manuscript that the 0.1° resolution of E-OBS and ERA5-Land may introduce biases when representing local-scale variability, particularly given the complex topography of the Adige basin. To address this, we have incorporated a reference that discusses these limitations, providing further support to our statement (Bandhauer et al., 2021). Nevertheless, these datasets remain the only long and continuous daily gridded records of both temperature and precipitation available for the region, which makes them the most suitable choice for our analysis. Please, see L. 150-155.**

6) The introduction cites several studies (e.g., Viviroli et al., 2007; Hao et al., 2022) to establish the importance of the Alpine region and compound extremes but lacks a critical synthesis. For example, it does not address whether previous studies have underestimated snow dynamics or elevation-dependent warming in the Alps, which are highlighted as unique challenges. I strongly

recommend considering these two studies: Assimilation of sentinel-based leaf area index for modeling surface-ground water interactions in irrigation districts; Elevation dependent change in ERA5 precipitation and its extremes.

**Thank you very much for this valuable suggestion. We fully agree that snow dynamics and elevation-dependent warming pose unique challenges in alpine attribution studies. Indeed, in the revised Introduction we explicitly highlight these processes as key drivers shaping CDHW events in mountain catchments (lines 73-80), together with the interrelated role of atmospheric water demand and water availability. These aspects are already discussed in the context of the limited representation of alpine processes in large-scale studies, supported by references such as Brunner et al. (2023), Jenicek et al. (2016), Pepin et al. (2015), Van Loon et al. (2015), and Mastrotheodoros et al. We believe this already provides the necessary critical synthesis, while keeping the introduction concise and directly focused on the objectives of the study. Regarding the two additional references suggested: the first one, focusing on leaf area index assimilation for irrigation modeling, is outside the scope of our study. The second one investigates elevation-dependent changes in precipitation and extremes across several regions globally. While highly relevant in a broader context, our focus here is on hot and dry events in a relatively small portion of the Alpine region. For this reason, we prefer to cite elevation-dependent warming more generally as a key local factor to be considered when extrapolating the findings of large-scale studies to the Alpine context.**

7) The abstract's note that over half of the EURO-CORDEX models failed to reproduce observed changes suggests potential issues with model selection or validation. The introduction does not foreshadow this, which could undermine confidence in the projections.

**We understand the reviewer's concern. However, the finding that more than half of the EURO-CORDEX models fail to reproduce the observed changes is in fact one of the main results of our study, rather than a limitation of model selection or validation. For this reason, we believe it is more appropriate to present and discuss this issue in detail in the Discussion sections (see lines 536-562), where we highlight its implications for confidence in future projections. Introducing this aspect in the Introduction would risk anticipating key results and affect the narrative flow.**

8) The streamflow story leans on one gauge (Trento) plus HERA; June reductions are attributed largely to earlier snowmelt. Please (i) discuss/quantify confounding from irrigation/hydropower operations (not just note restrictions), (ii) report whether HERA is "naturalized" or includes management, and (iii) add a simple basin water-balance perspective (snow cover, PET/ET0, soil moisture) to separate supply vs. demand effects.

**Thank you for your suggestions. On point (i), We acknowledge the reviewer's point on the potential confounding effects of irrigation and hydropower management. Most of the largest dams and artificial lakes in the Adige basin (e.g., Santa Giustina, 182 Mm<sup>3</sup>, built in 1951; Resia, 120 Mm<sup>3</sup>, built in 1949; Stramentizzo, 11.5 Mm<sup>3</sup>, built in 1956) were already in place at the beginning of the study period. This suggests that the major hydropower infrastructure was largely stable during 1951–2020, even though operational strategies may have evolved over time. We have included these details in the data section (see L172-178). In addition, quantifying these changes in management practices is not straightforward and would require additional datasets that are beyond the scope of this study.**

**As for irrigation, we agree that it represents another potential confounding factor. However, assessing its long-term influence would require consistent proxies (e.g., ET or soil moisture anomalies) or dedicated modelling exercises to reconstruct agricultural water use from 1951 onwards which goes beyond the scope of the study.**

For the second point (ii), we have clarified in the revised manuscript that HERA is not a naturalized dataset, as its long-term discharge trends reflect not only climate variability but also the influence of human management. However, as we pointed out before, the major hydropower infrastructure was largely stable during 1951–2020. In any case, we have highlighted that direct links between climatic drivers and discharge trends should be interpreted with caution (See L. 177-178).

Regarding the third point (iii), we acknowledge the importance of a basin-scale water-balance perspective to disentangle supply- versus demand-driven effects. Indeed, variables such as snow cover, PET/ET<sub>0</sub>, and soil moisture would provide valuable complementary insights. However, quantifying these processes in a consistent way for the entire catchment would require a dedicated hydrological modelling framework, which goes beyond the scope of this study. Instead, our analysis focuses on the meteorological drivers and their link to streamflow changes, while recognising that water balance components and management practices also play a role in shaping the observed discharge response (lines 172-178).

9) You show earlier snowmelt and an April/May discharge bump followed by June deficits. Consider cross-checking with independent snow data (in situ SWE, satellite snow extent) and add confidence intervals for the reported “30–40 cm per 30y” and “±40–60 m<sup>3</sup>/s” trends.

Thank you for this helpful suggestion. We have added a new supplementary figure showing the decrease in snow-covered days from MODIS observations, separated by elevation ranges, to support the results on earlier snowmelt (see Fig. A3). These results are clearly consistent with what we have already shown through the 3 in-situ observations used in this work. Refer to L415-417 for supporting text.

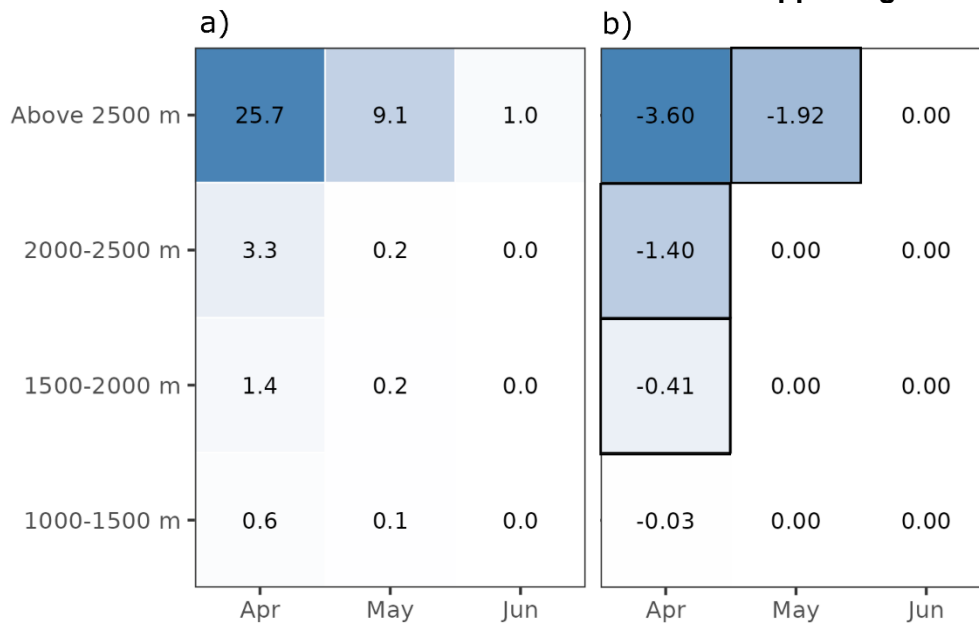

Figure A3. a) Average snow cover percentage for the period 2000–2023 by elevation band in the Adige catchment, derived from MODIS data. (b) Decadal trends in snow cover percentage over the same elevation bands. Cells highlighted with a black border denote trends that are statistically significant at the 95% confidence level.

In addition, we now provide confidence intervals at the 95% level for the long-term trends in both snow depth and river discharge, which have been incorporated into the main text (see lines 415-421). To further illustrate these uncertainties, we also include two supplementary figures displaying the confidence bands for both variables (Fig. A2).

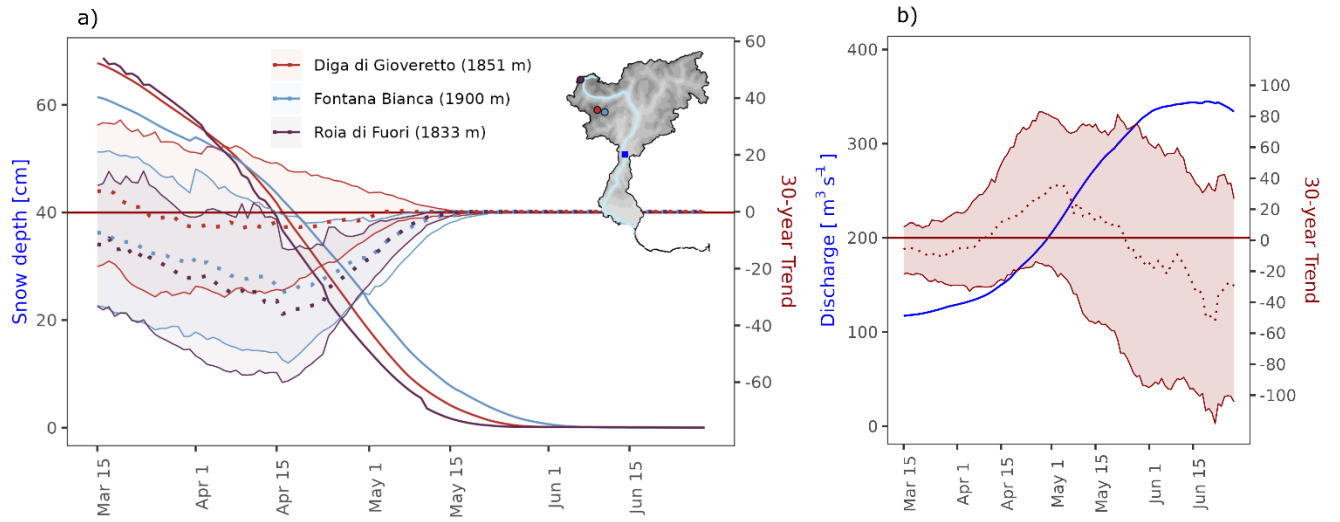

**Figure A2.** (a) Snow depth at three historical observatories in the northwestern Adige catchment (Diga di Gioveretto, Fontana Bianca, and Roia di Fuori) with 30-year day-of-year trends and their 95% confidence intervals over 1981–2018. (b) Same as (a) but for Adige River discharge at the Trento gauge station.

10) Beyond sign/magnitude counts, include formal skill scores (bias, RMSE, correlation, CRPS) for both conditioned and unconditioned reconstructions, and try simple emergent-constraint or performance-based weighting to see if an informed subset reduces the underestimation. Clarify implications of stitching historical with RCP8.5 to 2021.

Thank you for these valuable suggestions. The primary objective of our study regarding the EURO-CORDEX analysis was to assess the sign and magnitude of change (as stated in the objectives), rather than to provide a full forecast-verification suite. That said, we have taken up your idea of using performance-based selection. Specifically, we identify a subset of “better-performing” EURO-CORDEX models based on the similarity (lower RMSD) of their Z500 analogue patterns to observations (ERA5), consistent with the circulation-conditioned framework (see Fig. A3 for Z500). We now also provide the same evaluation for TX (new Fig. A4). Using the top-5 models as an informed subset does not significantly reduce the underestimation in the reconstructions of Z500 and TX -the two variables directly conditioned on circulation- so our conclusions are robust to model selection. We therefore keep the results centered on the sign–magnitude framing and the analogue-based evaluation, while documenting the performance-based subset test as noted above.

On the stitching of historical and RCP8.5 runs through 2021, we clarify that -consistent with other studies employing EURO-CORDEX- using only the early years of an RCP scenario (typically RCP8.5) does not introduce major artefacts in the results. Moreover, RCP8.5 best reflects the current pace of warming. This justification has been added in the Methods (lines 162-164).

11) Where you claim significant changes, consistently show effect sizes with CIs. You use Cramér–von Mises for some tests; extend uncertainty quantification to the event ranking, severity composites, and the discharge change maps (e.g., bootstrap over analogues and spatial blocks).

We appreciate this valuable comment. Following your suggestion, we have extended the uncertainty quantification across all analogue-based reconstructions. Specifically, the discharge change maps now also reflect the statistical significance of the observed differences (see new Figure 8).

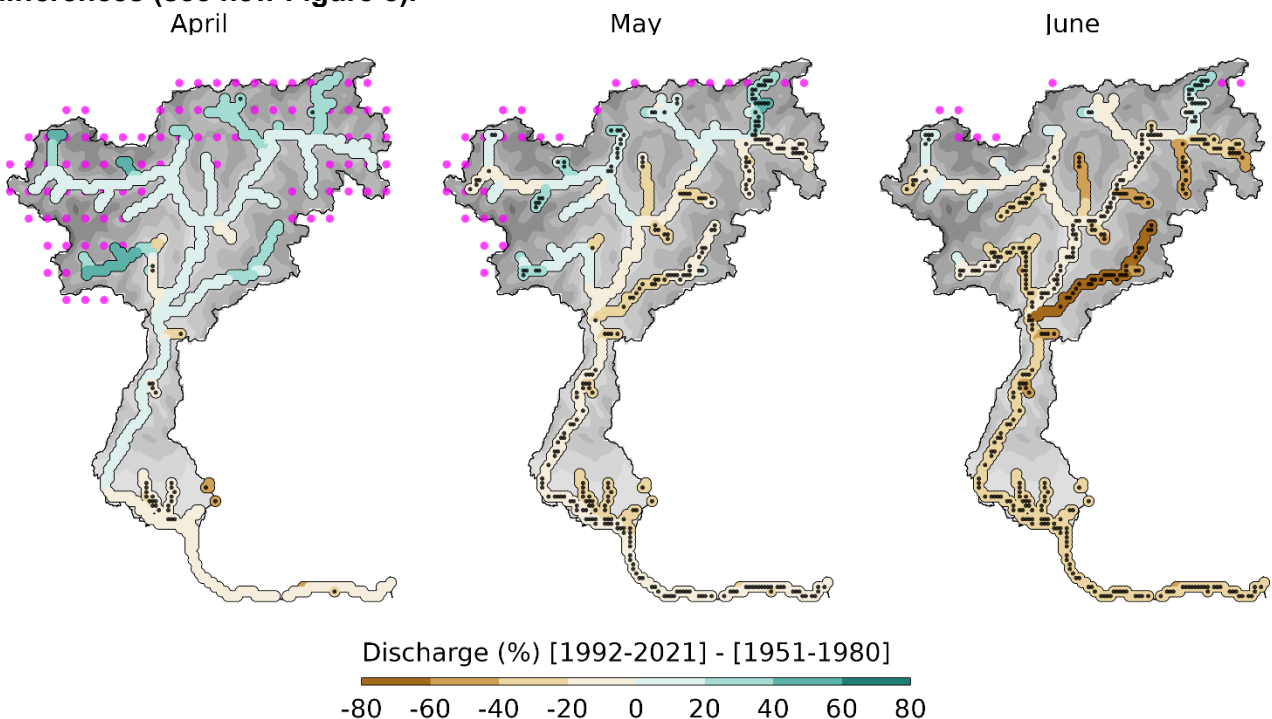

Figure 8. Relative changes in river discharge (%) in the Adige River basin between the periods 1992–2021 and 1951–1980 for April, May, and June. Black dots indicate statistically significant differences at the 95% confidence level. ERA5-Land pixels with

Regarding your earlier point, we have also broadened the confidence intervals as described in our response to Comment 9.

As for the event ranking and severity composites, these are derived directly from metric calculations (see methods section). Since they are not based on sampling or resampling procedures, no meaningful uncertainty analysis can be applied in this case.

12) Since analogues are conditioned on one pattern, stress-test conclusions by repeating the pipeline for another major CDHW (e.g., 2003/2018) to show the hydrologic timing signal is not event-specific.

Thank you again for your comment. Indeed, the May-June 2003 event was also one of the most intense CDHWs over the Adige catchment (ranked 2nd). As often happens, the strongest events are driven by similar circulation conditions. Therefore, we checked whether our analyses included analogues from May–June 2003 (Fig. R1). As you can see, some analogues are indeed taken from those months in 2003. We have clarified this in L. 514–517, noting that our results can also be extrapolated to events such as 2003, given the strong similarity in the underlying mechanisms.

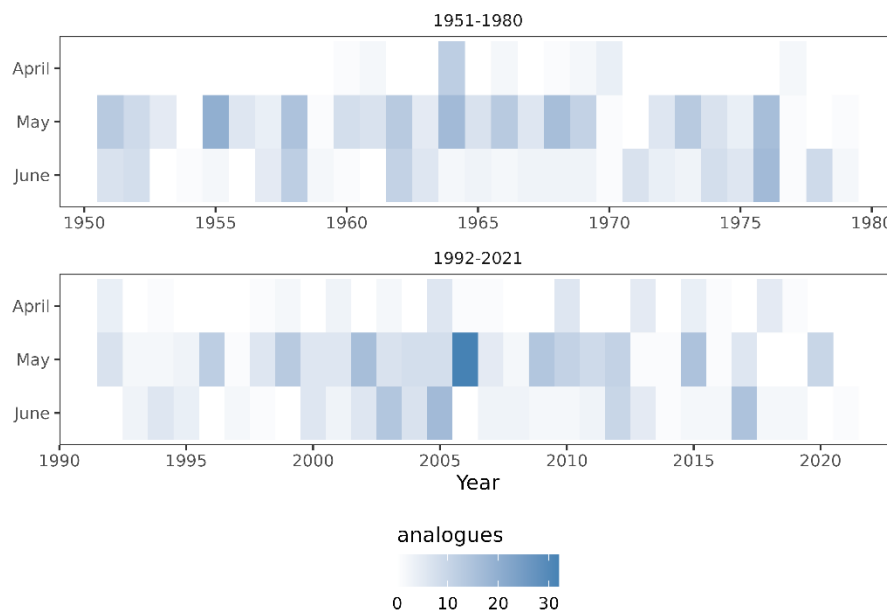

Fig R1. Number of analogues of the May 2022 event detected by year.

Although the 2018 event was very impactful in central and northern Europe (especially in France, Belgium, and the Netherlands), it was not as intense in the Adige catchment and does not reproduce exactly the same circulation pattern associated with extreme heat events in our target region. That said, replicating the same approach for 2003 would likely lead to results similar to those obtained for 2022, since the circulation does not change substantially from one event to the other (Fig R2).

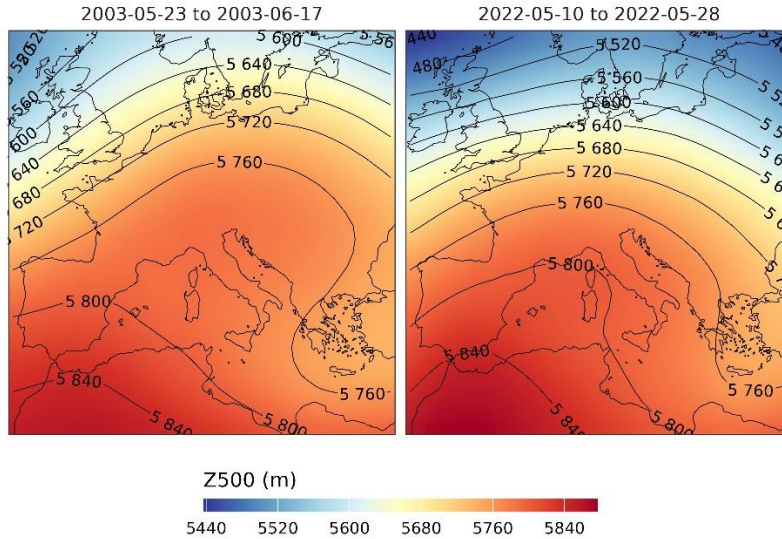

**Fig. R2. Averaged Z500 over the May 2003 and 2022 episodes.**

This manuscript presents a valuable analysis of compound dry and hot weather (CDHW) events in the Adige River Basin, with the 2022 event serving as a compelling case study. However, to meet the standards of HESS journal, the authors should strengthen the critical synthesis in the introduction, enhance methodological clarity in the abstract, and explicitly discuss the limitations of the data and modeling approach.

**We sincerely thank the reviewer for this constructive and encouraging overall assessment. We have aimed to address all comments and suggestions in detail, and we believe these changes have significantly improved the manuscript.**
